# Supplementary material for: Skin renewal activity of non-thermal plasma through the activation of β-catenin in keratinocytes
Source: PubMed Central journal article supplement (PMC5522407; doi:10.1038/s41598-017-06661-7), 2017-07-21

**Title:**  
Skin renewal activity of non-thermal plasma through  
the activation of  $\beta$ -catenin in keratinocytes

**Authors:** J.H. Choi<sup>1,2</sup>, Y.S. Song<sup>1</sup>, K. Song<sup>3</sup>, H.J. Lee<sup>4</sup>, J.W. Hong<sup>1,5\*</sup> and G.C. Kim<sup>2\*</sup>

**Affiliations:**

<sup>1</sup> Department of Internal Medicine, School of Korean Medicine, Pusan National University

<sup>2</sup> Department of Oral Anatomy and Cell Biology, School of Dentistry, Pusan National University

<sup>3</sup> Department of Biochemistry, College of Life Science and Biotechnology, Yonsei University

<sup>4</sup> Department of Electrical Engineering, Pusan National University

<sup>5</sup> (Bio)medical Research Institute, Pusan National University Hospital

**\*Corresponding authors:**

**Jin-Woo Hong**, Department of Internal Medicine, School of Korean Medicine, Yangsan Campus of Pusan National University, Beomeo-ri, Mulgeum-eup, Yangsan-si, Gyeongsangnam 626-870, South Korea, e-mail: [jwhong@pusan.ac.kr](mailto:jwhong@pusan.ac.kr)

**Gyoo-Cheon Kim**, Department of Anatomy and Cell Biology, School of Dentistry, Yangsan Campus of Pusan National University, Beomeo-ri, Mulgeum-eup, Yangsan-si, Gyeongsangnam 626-870, South Korea, e-mail: [ki91000m@pusan.ac.kr](mailto:ki91000m@pusan.ac.kr)

## Supplementary Figure S1

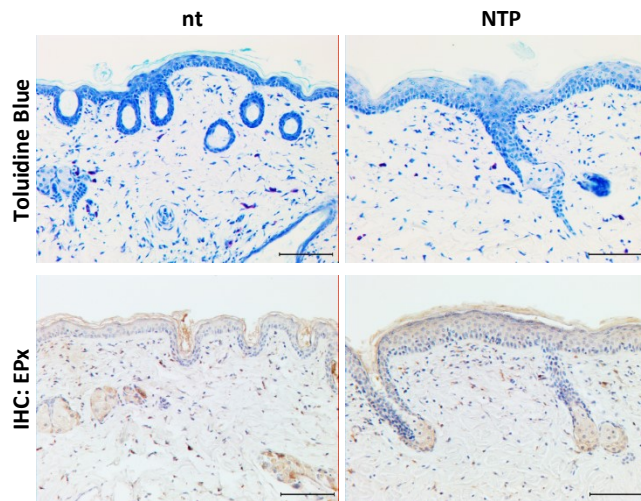

**Supplementary Figure S1: The effect of NTP treatment on cutaneous inflammation:** Dorsal skin of HRM2 mice were subjected to NTP treatment for 5 minutes, three times per week, for 2 weeks. After sacrificing the mice, the tissues were subjected to specific staining against mast cells (Toluidine Blue) and eosinophils (IHC:EPx) respectively. Scale bar: 100  $\mu$ m.

## Supplementary Figure S2

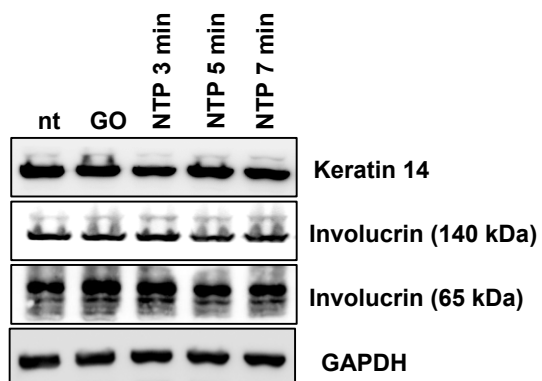

**Supplementary Figure S2: The effect of NTP treatment on the expressions of genes related with keratinocyte's differentiation.** Confluent HaCaT cells were treated with NTP for the indicated length of time and incubated for 6 hours. After harvesting the cells, the total protein extracts were used for Western blot analysis. **GO**: Gas only (argon).

## Supplementary Figure S3

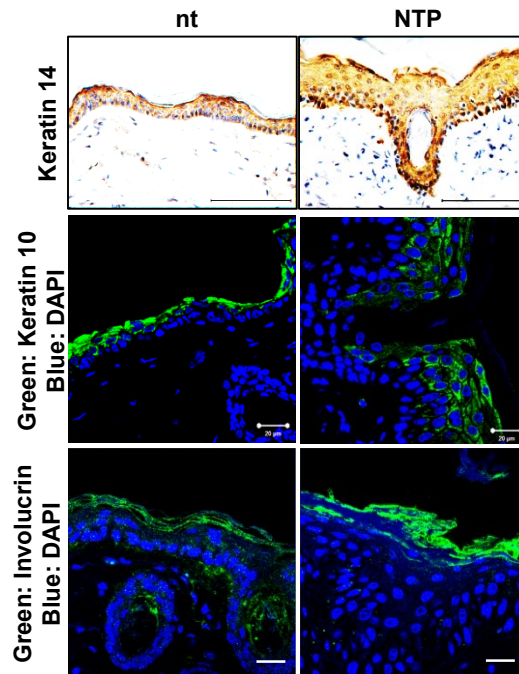

**Supplementary Figure S3: The effect of NTP treatment on the differentiation of keratinocytes within HRM2 mice skin.** Dorsal skin of HRM2 mice were subjected to NTP treatment for 5 minutes, three times per week, for 2 weeks. After sacrificing the mice, the tissues were subjected to IHC against Keratin 14 (scale bar: 100  $\mu$ m) or IF against Keratin 10 and involucrin (scale bar: 20  $\mu$ m).

Un-cropped Western blot images of Figure 3a

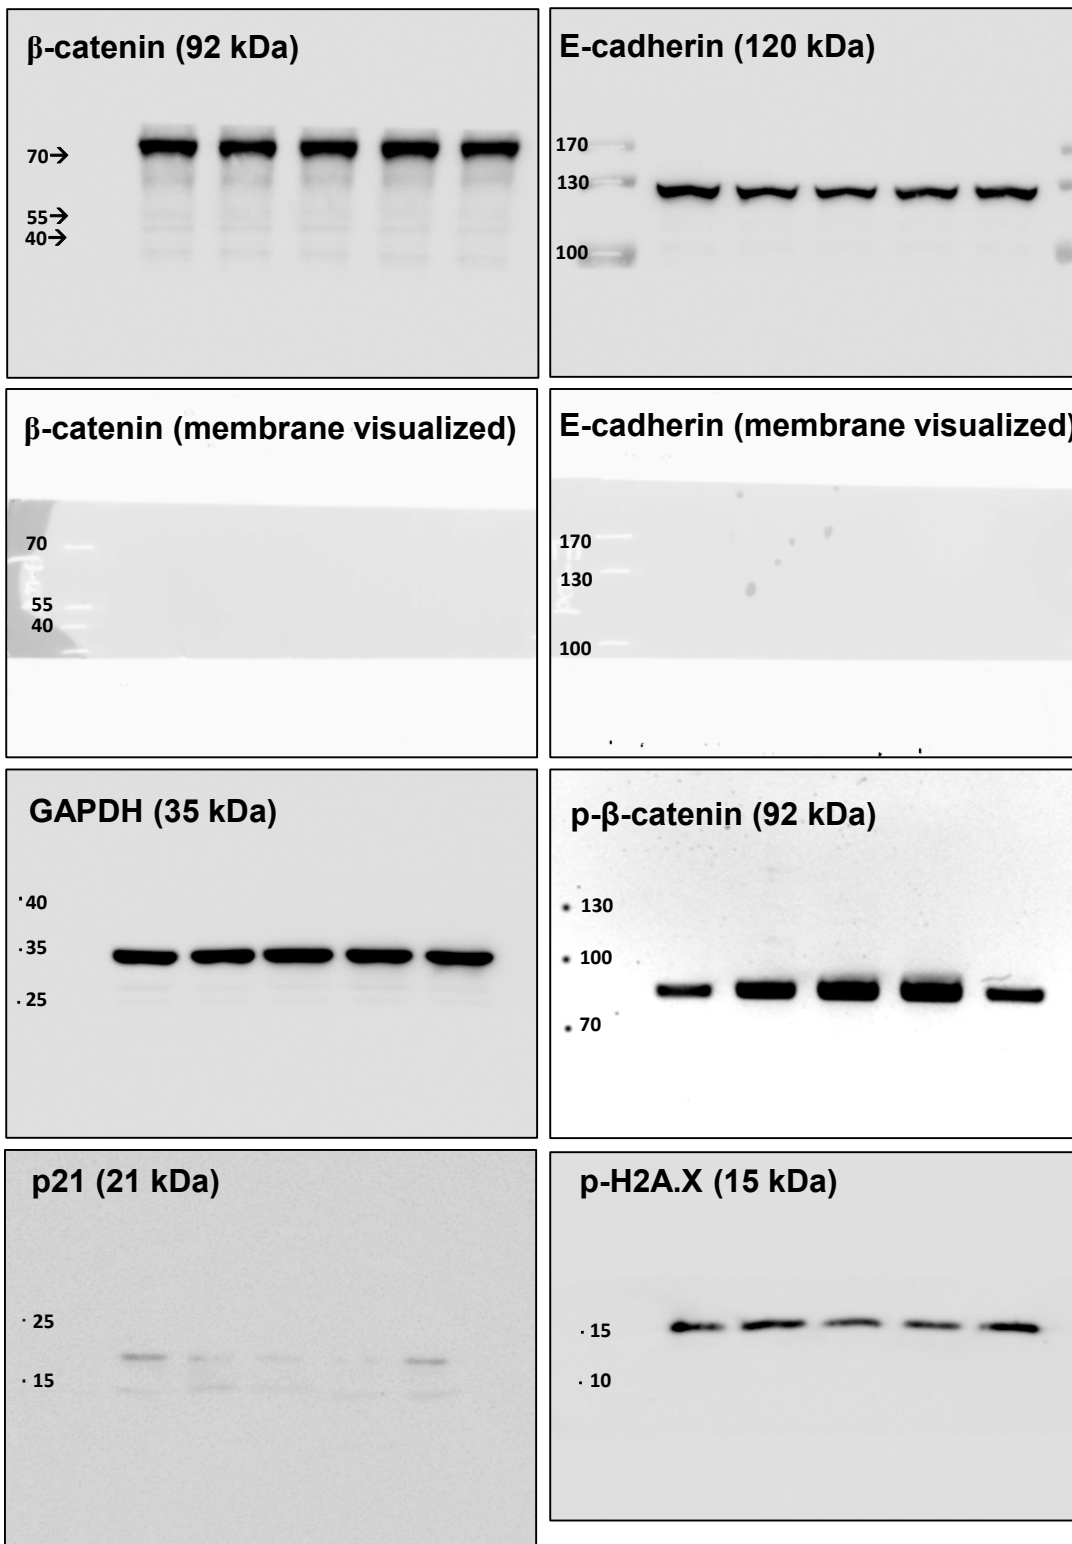

Un-cropped Western blot images of Figure 3b

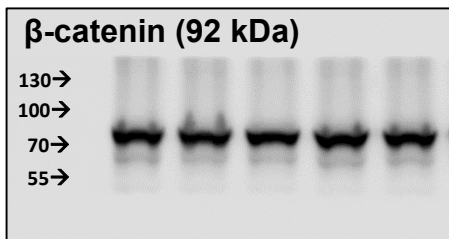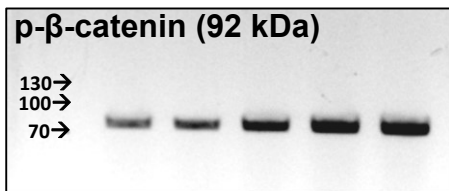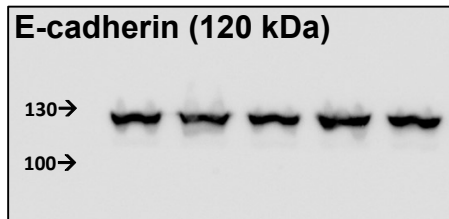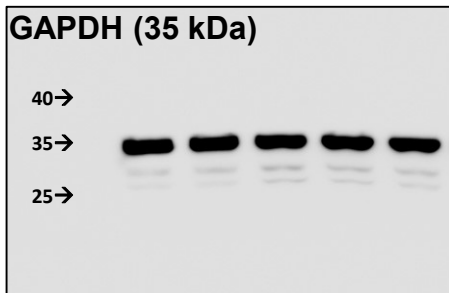

Un-cropped Western blot images of Figure 3c

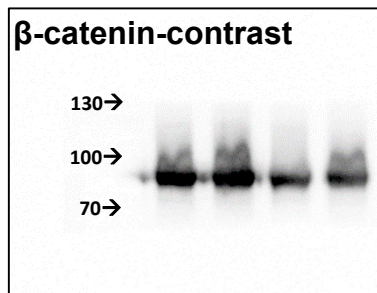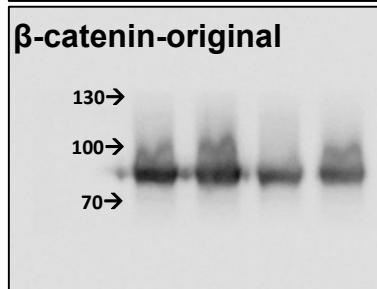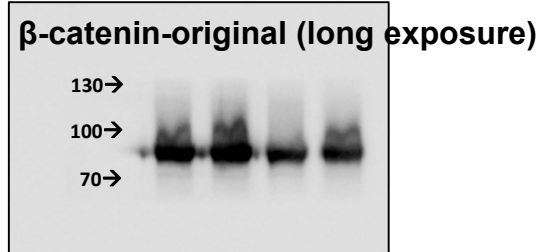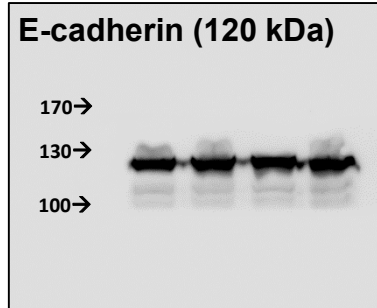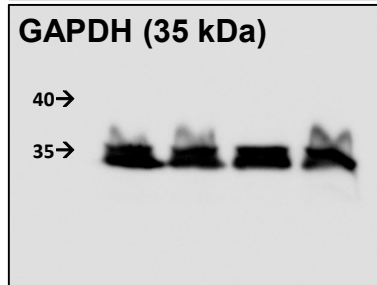

Full-gel images of Figure 3a

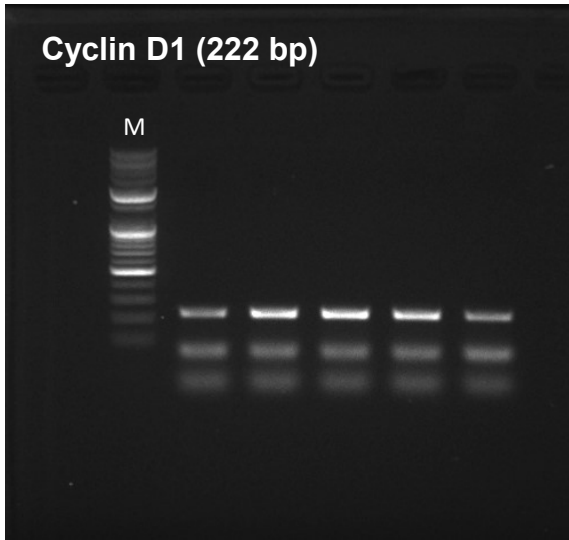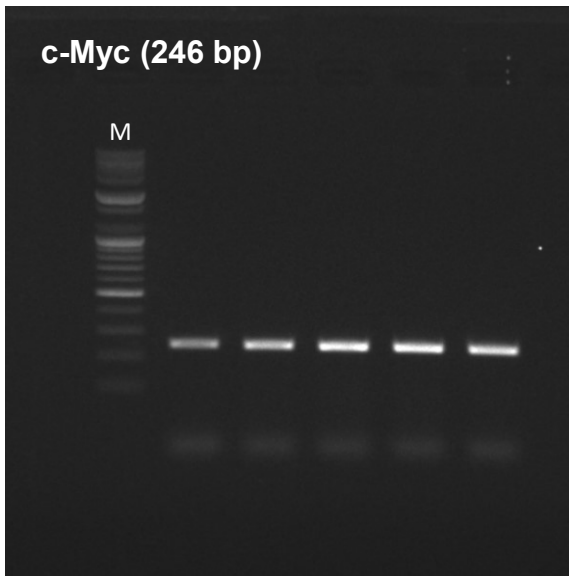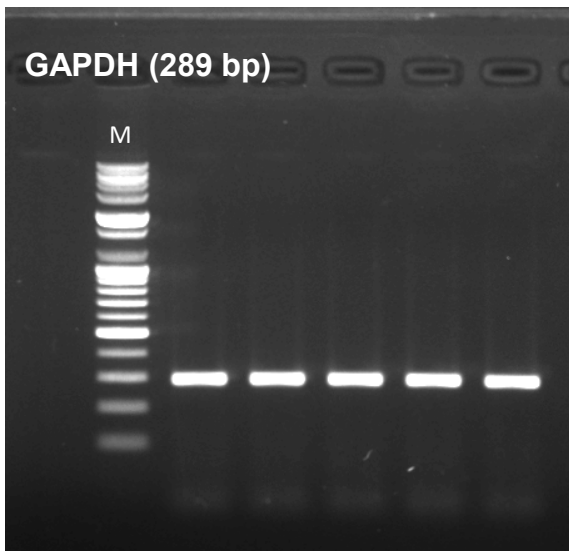

Full-gel images of Figure 3c

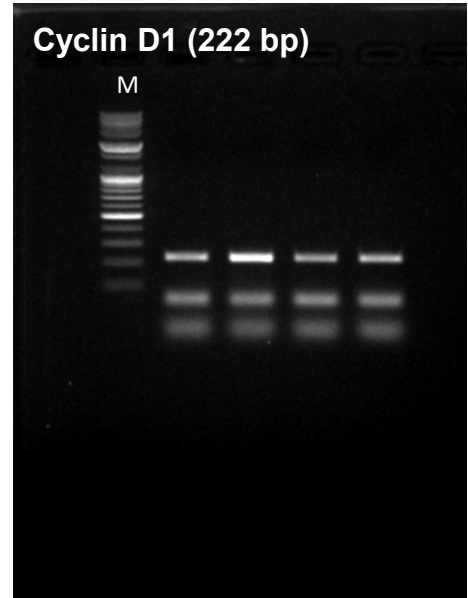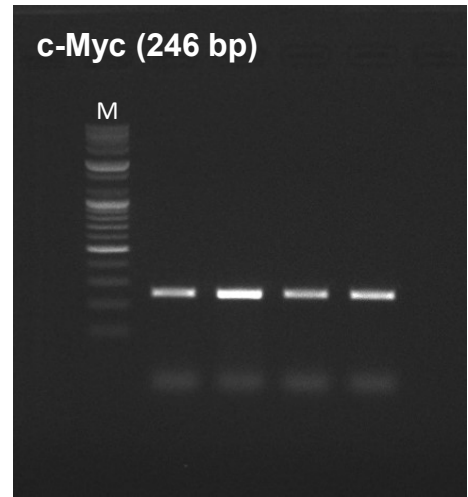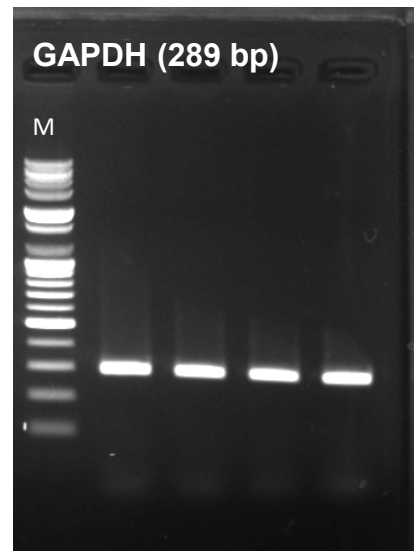

Supplement: 41598_2017_6661_MOESM1_ESM.pdf [file 41598_2017_6661_MOESM1_ESM.pdf]
